# Supplementary material
Source: PubMed Central journal article supplement (PMC8424660)
Supplement: NIHMS1734694-supplement-Supplementary_Dataset.pdf [file NIHMS1734694-supplement-Supplementary_Dataset.pdf]

## Dataset Legends

Dataset 1: Individual body weight measurements of cynomolgus monkeys treated with 3 doses of AIRISE-02 on days 1, 8 and 15.

Dataset 2: Individual pre- and post-injection hematology parameters of cynomolgus monkeys treated with 3 doses of AIRISE-02 on days 1, 8 and 15.

Dataset 3: Individual pre- and post-injection coagulation parameters of cynomolgus monkeys treated with 3 doses of AIRISE-02 on days 1, 8 and 15.

Dataset 4: Individual pre- and post-injection clinical chemistry parameters of cynomolgus monkeys treated with 3 doses of AIRISE-02 on days 1, 8 and 15.

Dataset 5: Pre- and post-injection cytokine levels in individual cynomolgus monkeys treated with 3 doses of AIRISE-02 on days 1, 8 and 15.

Dataset 6: Individual dermal observations of cynomolgus monkeys treated with three doses AIRISE-02. Dermal observations were evaluated according to the method of Draize.

Dataset 1: Individual body weight measurements of cynomolgus monkeys treated with 3 doses of AIRISE-02 on days 1, 8 and 15.

| <b>Animal number</b> | <b>Time (days)</b> | <b>Weight (kg)</b> |
|----------------------|--------------------|--------------------|
| 1                    | -7                 | 3.2                |
|                      | 1                  | 3.1                |
|                      | 8                  | 3.1                |
|                      | 15                 | 3.0                |
|                      | 22                 | 3.0                |
| 2                    | -8                 | 2.9                |
|                      | 1                  | 2.9                |
|                      | 8                  | 3.1                |
|                      | 15                 | 3.1                |
|                      | 22                 | 3.1                |
| 3                    | -8                 | 3.2                |
|                      | 1                  | 3.2                |
|                      | 8                  | 3.3                |
|                      | 15                 | 3.4                |
|                      | 22                 | 3.3                |

Dataset 2: Individual pre- and post-injection hematology parameters of cynomolgus monkeys treated with 3 doses of AIRISE-02 on days 1, 8 and 15.

| Animal number | Time (days) | WBC (10 <sup>3</sup> /uL) | NEUT (10 <sup>3</sup> /uL) | LYMPH (10 <sup>3</sup> /uL) | MONO (10 <sup>3</sup> /uL) | EOS (10 <sup>3</sup> /uL) | BASO (10 <sup>3</sup> /uL) | LUC (10 <sup>3</sup> /uL) | RBC (10 <sup>6</sup> /uL) | HGB (g/dL) | HCT (%) | MCV (fL) | MCH (pg) |
|---------------|-------------|---------------------------|----------------------------|-----------------------------|----------------------------|---------------------------|----------------------------|---------------------------|---------------------------|------------|---------|----------|----------|
| 1             | -4          | 7.51                      | 1.77                       | 5.02                        | 0.32                       | 0.32                      | 0.03                       | 0.05                      | 5.59                      | 13.8       | 46.5    | 83.3     | 24.8     |
|               | 2           | 17.32                     | 14.29                      | 1.80                        | 1.09                       | 0.02                      | 0.02                       | 0.10                      | 4.77                      | 11.8       | 37.9    | 79.4     | 24.8     |
|               | 7           | 12.37                     | 9.51                       | 2.50                        | 0.22                       | 0.09                      | 0.02                       | 0.03                      | 4.81                      | 11.7       | 38.2    | 79.5     | 24.3     |
|               | 9           | 13.36                     | 11.66                      | 1.03                        | 0.58                       | 0.00                      | 0.01                       | 0.06                      | 4.21                      | 10.3       | 33.2    | 79.0     | 24.6     |
|               | 14          | 7.43                      | 3.93                       | 3.19                        | 0.20                       | 0.06                      | 0.01                       | 0.03                      | 4.73                      | 11.6       | 38.2    | 80.7     | 24.4     |
|               | 17          | 15.00                     | 12.53                      | 1.59                        | 0.81                       | 0.01                      | 0.02                       | 0.04                      | 3.89                      | 9.4        | 30.8    | 79.2     | 24.1     |
|               | 22          | 12.02                     | 5.03                       | 6.34                        | 0.41                       | 0.15                      | 0.03                       | 0.05                      | 4.25                      | 10.2       | 35.1    | 82.6     | 24.0     |
| 2             | -5          | 16.31                     | 5.40                       | 9.11                        | 1.02                       | 0.56                      | 0.06                       | 0.16                      | 5.26                      | 12.6       | 41.8    | 79.5     | 23.9     |
|               | 2           | 14.33                     | 10.31                      | 3.11                        | 0.67                       | 0.09                      | 0.03                       | 0.12                      | 4.85                      | 11.5       | 37.8    | 78.0     | 23.6     |
|               | 7           | 12.18                     | 4.34                       | 6.38                        | 0.64                       | 0.65                      | 0.08                       | 0.09                      | 4.89                      | 11.7       | 39.5    | 80.8     | 23.9     |
|               | 9           | 19.23                     | 14.38                      | 3.44                        | 0.94                       | 0.32                      | 0.05                       | 0.12                      | 4.46                      | 10.7       | 36.3    | 81.5     | 23.9     |
|               | 14          | 10.69                     | 2.93                       | 6.61                        | 0.65                       | 0.38                      | 0.05                       | 0.07                      | 4.86                      | 11.3       | 39.0    | 80.3     | 23.2     |
|               | 17          | 19.57                     | 16.30                      | 2.24                        | 0.78                       | 0.10                      | 0.03                       | 0.12                      | 4.58                      | 10.8       | 37.0    | 80.9     | 23.5     |
|               | 22          | 10.70                     | 1.65                       | 7.73                        | 0.79                       | 0.40                      | 0.05                       | 0.09                      | 4.72                      | 11.4       | 39.2    | 83.1     | 24.1     |
| 3             | -5          | 12.54                     | 3.35                       | 8.33                        | 0.71                       | 0.05                      | 0.04                       | 0.05                      | 5.61                      | 13.7       | 45.5    | 81.0     | 24.4     |
|               | 2           | 11.46                     | 6.59                       | 3.93                        | 0.87                       | 0.01                      | 0.02                       | 0.05                      | 4.89                      | 11.8       | 39.1    | 79.9     | 24.1     |
|               | 7           | 13.65                     | 5.33                       | 7.59                        | 0.59                       | 0.03                      | 0.04                       | 0.07                      | 4.80                      | 11.6       | 38.9    | 81.1     | 24.1     |
|               | 9           | 13.06                     | 8.40                       | 3.37                        | 1.19                       | 0.01                      | 0.02                       | 0.07                      | 4.23                      | 10.1       | 35.1    | 82.9     | 24.0     |
|               | 14          | 10.82                     | 2.61                       | 7.31                        | 0.77                       | 0.02                      | 0.05                       | 0.05                      | 4.51                      | 10.9       | 36.6    | 81.2     | 24.2     |
|               | 17          | 14.40                     | 7.96                       | 5.64                        | 0.68                       | 0.01                      | 0.04                       | 0.08                      | 4.13                      | 9.9        | 35.3    | 85.3     | 23.9     |
|               | 22          | 13.49                     | 3.44                       | 8.91                        | 0.99                       | 0.01                      | 0.05                       | 0.09                      | 4.47                      | 10.5       | 37.7    | 84.5     | 23.5     |

Dataset 2: Individual pre- and post-injection hematology parameters of cynomolgus monkeys treated with 3 doses of AIRISE-02 on days 1, 8 and 15.

| Animal number | Time (days) | MCHC (g/dL) | RDW (%) | PLT (10 <sup>3</sup> /uL) | RETIC (10 <sup>9</sup> /L) |
|---------------|-------------|-------------|---------|---------------------------|----------------------------|
| 1             | -4          | 29.7        | 13.1    | 391                       | 154.4                      |
|               | 2           | 31.2        | 13.4    | 302                       | 109.0                      |
|               | 7           | 30.5        | 13.4    | 364                       | 158.0                      |
|               | 9           | 31.1        | 13.4    | 317                       | 163.8                      |
|               | 14          | 30.3        | 14.2    | 402                       | 276.1                      |
|               | 17          | 30.5        | 14.3    | 349                       | 176.9                      |
|               | 22          | 29.1        | 14.5    | 488                       | 383.8                      |
| 2             | -5          | 30.1        | 13.9    | 453                       | 101.9                      |
|               | 2           | 30.3        | 14.8    | 578                       | 188.1                      |
|               | 7           | 29.6        | 14.6    | 896                       | 339.6                      |
|               | 9           | 29.3        | 14.6    | 779                       | 253.3                      |
|               | 14          | 28.9        | 14.5    | 602                       | 323.6                      |
|               | 17          | 29.1        | 14.6    | 531                       | 240.2                      |
|               | 22          | 28.9        | 14.2    | 656                       | 262.9                      |
| 3             | -5          | 30.1        | 12.5    | 369                       | 106.7                      |
|               | 2           | 30.2        | 12.8    | 339                       | 106.6                      |
|               | 7           | 29.8        | 13.3    | 447                       | 262.6                      |
|               | 9           | 28.9        | 13.4    | 383                       | 273.3                      |
|               | 14          | 29.8        | 14.1    | 450                       | 400.9                      |
|               | 17          | 28.1        | 14.1    | 428                       | 445.7                      |
|               | 22          | 27.8        | 13.8    | 503                       | 369.9                      |

Dataset 2: Individual pre- and post-injection hematology parameters of cynomolgus monkeys treated with 3 doses of AIRISE-02 on days 1, 8 and 15.

**TABLE EXPLANATION**

| <b>Abbreviation</b> | <b>Description</b>                        |
|---------------------|-------------------------------------------|
| WBC                 | White blood cells                         |
| NEUT                | Neutrophils                               |
| LYMPH               | Lymphocytes                               |
| MONO                | Monocytes                                 |
| EOS                 | Eosinophils                               |
| LUC                 | Large unstained cells                     |
| RBC                 | Red blood cells                           |
| HGB                 | Hemoglobin                                |
| HCT                 | Hematocrit                                |
| MCV                 | Mean corpuscular volume                   |
| MCH                 | Mean corpuscular hemoglobin               |
| MCHC                | Mean corpuscular hemoglobin concentration |
| RDW                 | Red blood cell distribution width         |
| PLT                 | Platelets                                 |
| RETIC               | Reticulocytes                             |

Dataset 3: Individual pre- and post-injection coagulation parameters of cynomolgus monkeys treated with 3 doses of AIRISE-02 on days 1, 8 and 15.

| Animal number | Time (days) | PT (sec) | APTT (sec) | FIB (mg/dL) | SAMQ Coagulation |
|---------------|-------------|----------|------------|-------------|------------------|
| 1             | -4          | 11.2     | 17.0       | 266         | N                |
|               | 2           | 11.0     | 17.6       | 374         | N                |
|               | 7           | 10.6     | 18.3       | 325         | N                |
|               | 9           | 10.9     | 17.5       | 327         | N                |
|               | 14          | 10.6     | 17.3       | 345         | N                |
|               | 17          | 10.9     | 18.7       | 374         | I+               |
|               | 22          | 10.6     | 17.9       | 332         | N                |
| 2             | -5          | 11.9     | 17.4       | 196         | N                |
|               | 2           | 11.6     | 18.9       | 289         | N                |
|               | 7           | 10.8     | 20.0       | 223         | N                |
|               | 9           | 11.1     | 19.5       | 319         | N                |
|               | 14          | 10.8     | 20.3       | 258         | N                |
|               | 17          | 11.2     | 19.3       | 276         | N                |
|               | 22          | 11.1     | 19.9       | 229         | N                |
| 3             | -5          | 11.7     | 16.9       | 214         | N                |
|               | 2           | 12.6     | 17.0       | 286         | N                |
|               | 7           | 11.5     | 17.8       | 272         | N                |
|               | 9           | 11.2     | 17.1       | 377         | N                |
|               | 14          | 11.2     | 18.4       | 317         | N                |
|               | 17          | 11.9     | 17.6       | 317         | N                |
|               | 22          | 11.5     | 18.3       | 338         | N                |

**TABLE EXPLANATION**

| Abbreviation | Description                                |
|--------------|--------------------------------------------|
| PT           | Prothrombin time                           |
| APTT         | Activated partial thromboplastin time      |
| FIB          | Fibrinogen                                 |
| SAMQ         | Sample quality                             |
| N            | Normal sample                              |
| I            | Icterus sample                             |
| I+           | Icterus sample slight (dark yellow)        |
| I++          | Icterus sample moderate (very dark yellow) |
| I+++         | Icterus sample severe (dark yellow-green)  |

Dataset 4: Individual pre- and post-injection clinical chemistry parameters of cynomolgus monkeys treated with 3 doses of AIRISE-02 on days 1, 8 and 15.

| Animal number | Time (days) | AST (U/L) | ALT (U/L) | ALP (U/L) | GGT (U/L) | CK (U/L) | TBIL (mg/dL) | DBIL (mg/dL) | IBIL (mg/dL) | UREA N (mg/dL) | CREAT (mg/dL) | GLUC (mg/dL) | CHOL (mg/dL) |
|---------------|-------------|-----------|-----------|-----------|-----------|----------|--------------|--------------|--------------|----------------|---------------|--------------|--------------|
| 1             | -4          | 29        | 38        | 299       | 59        | 200      | 0.25         | -            | -            | 23             | 0.7           | 83           | 164          |
|               | 2           | 187       | 112       | 230       | 46        | 1276     | 0.54         | 0.19         | 0.35         | 26             | 0.8           | 74           | 116          |
|               | 7           | 43        | 58        | 215       | 43        | 228      | 0.25         | -            | -            | 39             | 0.7           | 57           | 131          |
|               | 9           | 47        | 64        | 204       | 39        | 420      | 0.3          | -            | -            | 28             | 0.7           | 72           | 116          |
|               | 14          | 46        | 48        | 234       | 38        | 444      | 0.24         | -            | -            | 27             | 0.6           | 48           | 160          |
|               | 17          | 51        | 45        | 203       | 37        | 989      | 0.3          | -            | -            | 28             | 0.6           | 87           | 116          |
|               | 22          | 37        | 40        | 225       | 44        | 336      | 0.17         | -            | -            | 26             | 0.7           | 72           | 140          |
| 2             | -5          | 69        | 61        | 303       | 39        | 2710     | 0.16         | -            | -            | 26             | 0.5           | 114          | 135          |
|               | 2           | 106       | 72        | 285       | 39        | 595      | 0.42         | -            | -            | 26             | 0.5           | 45           | 124          |
|               | 7           | 52        | 52        | 235       | 37        | 414      | 0.17         | -            | -            | 24             | 0.5           | 91           | 124          |
|               | 9           | 70        | 57        | 271       | 39        | 432      | 0.22         | -            | -            | 20             | 0.3           | 62           | 120          |
|               | 14          | 50        | 56        | 244       | 37        | 200      | 0.17         | -            | -            | 26             | 0.4           | 67           | 127          |
|               | 17          | 49        | 56        | 250       | 37        | 200      | 0.2          | -            | -            | 25             | 0.5           | 72           | 120          |
|               | 22          | 41        | 40        | 217       | 40        | 949      | 0.13         | -            | -            | 24             | 0.4           | 79           | 122          |
| 3             | -5          | 23        | 38        | 257       | 41        | 186      | 0.1          | -            | -            | 23             | 0.4           | 81           | 126          |
|               | 2           | 61        | 37        | 289       | 34        | 391      | 0.37         | -            | -            | 16             | 0.7           | 99           | 111          |
|               | 7           | 34        | 35        | 238       | 35        | 392      | 0.17         | -            | -            | 20             | 0.7           | 141          | 116          |
|               | 9           | 45        | 40        | 278       | 40        | 179      | 0.18         | -            | -            | 20             | 0.5           | 88           | 105          |
|               | 14          | 35        | 45        | 266       | 37        | 165      | 0.14         | -            | -            | 19             | 0.6           | 105          | 116          |
|               | 17          | 39        | 39        | 263       | 33        | 136      | 0.15         | -            | -            | 22             | 0.6           | 105          | 110          |
|               | 22          | 25        | 29        | 239       | 36        | 750      | 0.09         | -            | -            | 19             | 0.5           | 104          | 112          |

Dataset 4: Individual pre- and post-injection clinical chemistry parameters of cynomolgus monkeys treated with 3 doses of AIRISE-02 on days 1, 8 and 15.

| Animal number | Time (days) | TRIG (mg/dL) | TPROT (g/dL) | ALB (g/dL) | GLOB (g/dL) | A/G (ratio) | CA (mg/dL) | PHOS (mg/dL) | PHOS/C REAT | CA/PHOS | NA (mEq/L) | K (mEq/L) | CL (mEq/L) |
|---------------|-------------|--------------|--------------|------------|-------------|-------------|------------|--------------|-------------|---------|------------|-----------|------------|
| 1             | -4          | 36           | 7.8          | 4.9        | 2.9         | 1.7         | 10.8       | 6.4          | 9.1         | 1.7     | 151        | 5.1       | 108        |
|               | 2           | 34           | 7.0          | 4.6        | 2.4         | 1.9         | 9.6        | 4.5          | 5.8         | 2.1     | 148        | 3.4       | 107        |
|               | 7           | 60           | 7.1          | 4.5        | 2.6         | 1.7         | 9.2        | 5.5          | 8.0         | 1.7     | 146        | 4.0       | 109        |
|               | 9           | 36           | 6.7          | 4.2        | 2.5         | 1.7         | 9.9        | 4.1          | 6.1         | 2.4     | 145        | 4.3       | 107        |
|               | 14          | 42           | 7.3          | 4.3        | 3.0         | 1.4         | 9.4        | 6.3          | 9.8         | 1.5     | 144        | 4.3       | 108        |
|               | 17          | 34           | 6.7          | 4.0        | 2.7         | 1.5         | 9.5        | 5.2          | 8.4         | 1.8     | 145        | 4.8       | 108        |
|               | 22          | 43           | 6.3          | 3.9        | 2.4         | 1.6         | 9.4        | 5.9          | 9.1         | 1.6     | 144        | 4.9       | 107        |
| 2             | -5          | 121          | 6.7          | 3.8        | 2.9         | 1.3         | 10.3       | 3.7          | 8.0         | 2.8     | 147        | 4.7       | 109        |
|               | 2           | 39           | 7.1          | 4.0        | 3.1         | 1.3         | 9.4        | 6.3          | 14.0        | 1.5     | 148        | 3.9       | 112        |
|               | 7           | 59           | 6.9          | 3.8        | 3.1         | 1.2         | 9.2        | 5.0          | 11.1        | 1.8     | 146        | 4.5       | 113        |
|               | 9           | 52           | 7.0          | 3.8        | 3.2         | 1.2         | 9.5        | 6.2          | 18.2        | 1.5     | 150        | 4.7       | 113        |
|               | 14          | 75           | 6.9          | 3.7        | 3.2         | 1.2         | 9.1        | 6.0          | 13.6        | 1.5     | 148        | 4.3       | 109        |
|               | 17          | 50           | 7.0          | 3.8        | 3.2         | 1.2         | 8.7        | 6.4          | 13.6        | 1.4     | 148        | 3.9       | 109        |
|               | 22          | 61           | 6.4          | 3.4        | 3.0         | 1.1         | 9.3        | 5.6          | 13.7        | 1.7     | 146        | 4.8       | 107        |
| 3             | -5          | 76           | 7.0          | 4.4        | 2.6         | 1.7         | 10.4       | 4.9          | 11.7        | 2.1     | 146        | 5.9       | 113        |
|               | 2           | 64           | 7.1          | 4.6        | 2.5         | 1.8         | 9.5        | 4.8          | 7.3         | 2.0     | 148        | 5.3       | 113        |
|               | 7           | 50           | 6.9          | 4.4        | 2.5         | 1.8         | 9.3        | 5.0          | 7.4         | 1.9     | 144        | 4.2       | 108        |
|               | 9           | 49           | 7.0          | 4.3        | 2.7         | 1.6         | 9.8        | 4.2          | 8.2         | 2.3     | 152        | 4.8       | 111        |
|               | 14          | 56           | 7.1          | 4.3        | 2.8         | 1.5         | 9.0        | 5.9          | 10.4        | 1.5     | 146        | 4.5       | 108        |
|               | 17          | 65           | 7.2          | 4.4        | 2.8         | 1.6         | 9.4        | 6.0          | 10.9        | 1.6     | 150        | 5.0       | 110        |
|               | 22          | 62           | 6.9          | 4.1        | 2.8         | 1.5         | 9.4        | 5.8          | 12.9        | 1.6     | 144        | 5.0       | 109        |



Dataset 4: Individual pre- and post-injection clinical chemistry parameters of cynomolgus monkeys treated with 3 doses of AIRISE-02 on days 1, 8 and 15.

| Animal number | Time (days) | Na/K (Serum) (mEq/L) | SAMQ | UREAN/CREAT (mmol/L) | A/H | ALT/AST (ratio) | CA/CREAT |
|---------------|-------------|----------------------|------|----------------------|-----|-----------------|----------|
| 1             | -4          | 29.9                 | N    | 32.9                 | 0.4 | 1.3             | 15.4     |
|               | 2           | 43.0                 | N    | 33.5                 | 0.4 | 0.6             | 12.5     |
|               | 7           | 36.9                 | N    | 55.9                 | 0.4 | 1.3             | 13.3     |
|               | 9           | 34.1                 | N    | 41.0                 | 0.4 | 1.4             | 14.8     |
|               | 14          | 33.5                 | N    | 42.2                 | 0.4 | 1.0             | 14.7     |
|               | 17          | 30.0                 | H+   | 44.8                 | 0.4 | 0.9             | 15.3     |
|               | 22          | 29.1                 | N    | 40.0                 | 0.4 | 1.1             | 14.5     |
| 2             | -5          | 31.5                 | H+   | 56.5                 | 0.3 | 0.9             | 22.4     |
|               | 2           | 37.8                 | N    | 57.6                 | 0.3 | 0.7             | 20.9     |
|               | 7           | 32.4                 | N    | 54.0                 | 0.3 | 1.0             | 20.4     |
|               | 9           | 32.0                 | N    | 58.5                 | 0.4 | 0.8             | 27.9     |
|               | 14          | 34.6                 | N    | 58.4                 | 0.3 | 1.1             | 20.7     |
|               | 17          | 38.3                 | N    | 52.3                 | 0.4 | 1.1             | 18.5     |
|               | 22          | 30.5                 | N    | 58.3                 | 0.3 | 1.0             | 22.7     |
| 3             | -5          | 24.7                 | N    | 55.7                 | 0.3 | 1.7             | 24.8     |
|               | 2           | 27.7                 | H+++ | 24.2                 | 0.4 | 0.6             | 14.4     |
|               | 7           | 34.0                 | N    | 29.3                 | 0.4 | 1.0             | 13.7     |
|               | 9           | 31.9                 | N    | 39.0                 | 0.4 | 0.9             | 19.2     |
|               | 14          | 32.2                 | N    | 32.6                 | 0.4 | 1.3             | 15.8     |
|               | 17          | 30.2                 | H+   | 39.3                 | 0.4 | 1.0             | 17.1     |
|               | 22          | 28.7                 | N    | 42.7                 | 0.4 | 1.2             | 20.9     |

Dataset 4: Individual pre- and post-injection clinical chemistry parameters of cynomolgus monkeys treated with 3 doses of AIRISE-02 on days 1, 8 and 15.

**TABLE EXPLANATION**

| <b>Abbreviation</b> | <b>Description</b>                                        |
|---------------------|-----------------------------------------------------------|
| AST                 | Aspartate aminotransferase                                |
| ALT                 | Alanine aminotransferase                                  |
| ALP                 | Alkaline phosphatase                                      |
| GGT                 | Gamma glutamyltransferase                                 |
| CK                  | creatine kinase                                           |
| TBIL                | Total bilirubin                                           |
| DBIL                | Direct bilirubin                                          |
| IBIL                | Indirect bilirubin                                        |
| UREA N              | Urea nitrogen                                             |
| CREAT               | Creatinine                                                |
| GLUC                | Glucose                                                   |
| CHOL                | Cholesterol                                               |
| TRIG                | Triglycerides                                             |
| TPROT               | Total protein                                             |
| ALB                 | Albumin                                                   |
| GLOB                | Globulin                                                  |
| A/G                 | Albumin/Globulin ratio                                    |
| CA                  | Calcium                                                   |
| PHOS                | Phosphorus                                                |
| PHOS/CREAT          | Phosphorus/Creatinine ratio                               |
| NA                  | Sodium                                                    |
| K                   | Potassium                                                 |
| CL                  | Chloride                                                  |
| NA/K                | Sodium/Potassium ratio                                    |
| SAMQ                | Sample quality                                            |
| UREAN/CREAT         | Urea nitrogen/Creatinine ratio                            |
| ALT/AST             | Alanine aminotransferase/Aspartate aminotransferase ratio |
| CA/CREAT            | Calcium/Creatinine ratio                                  |
| N                   | Normal sample                                             |
| H+                  | Hemolyzed sample slight (pale/light red)                  |
| H++                 | Hemolyzed sample moderate (red)                           |
| H+++                | Hemolysed sample severe (dark red)                        |
| -                   | No findings/Not evaluated                                 |

Dataset 5: Pre- and post-injection cytokine levels in individual cynomolgus monkeys treated with 3 doses of AIRISE-02 on days 1, 8 and 15.

| Animal number | Time (days) | TNF-alpha (pg/mL) | IFN-gamma (pg/mL) | IL-1 beta (pg/mL) | IL-6 (pg/mL) | MCP-1 (pg/mL) |
|---------------|-------------|-------------------|-------------------|-------------------|--------------|---------------|
| 1             | 1           | <2.44             | <2.44             | <2.44             | <2.44        | 278.65        |
|               | 1.25        | <2.44             | <2.44             | <2.44             | <2.44        | 490.60        |
|               | 2           | <2.44             | <2.44             | <2.44             | 11.6         | 538.88        |
|               | 8           | <2.44             | <2.44             | <2.44             | <2.44        | 607.83        |
|               | 8.25        | <2.44             | <2.44             | <2.44             | <2.44        | 547.58        |
|               | 9           | <2.44             | 9.09              | <2.44             | 22.01        | 1335.05       |
|               | 10          | <2.44             | <2.44             | <2.44             | <2.44        | 509.91        |
|               | 15          | <2.44             | <2.44             | <2.44             | <2.44        | 597.00        |
|               | 15.25       | <2.44             | <2.44             | <2.44             | 14.36        | 765.90        |
|               | 16          | <2.44             | <2.44             | <2.44             | 28.54        | 846.12        |
| 2             | 17          | <2.44             | <2.44             | <2.44             | 103.56       | 825.26        |
|               | 1           | <2.44             | <2.44             | <2.44             | <2.44        | 334.12        |
|               | 1.25        | <2.44             | <2.44             | <2.44             | <2.44        | 824.21        |
|               | 2           | <2.44             | <2.44             | <2.44             | <2.44        | 441.49        |
|               | 8           | <2.44             | 9.09              | <2.44             | <2.44        | 825.47        |
|               | 8.25        | <2.44             | 14.41             | <2.44             | <2.44        | 1384.21       |
|               | 9           | <2.44             | <2.44             | <2.44             | 12.61        | 1046.59       |
|               | 10          | <2.44             | <2.44             | <2.44             | <2.44        | 886.03        |
|               | 15          | <2.44             | <2.44             | <2.44             | <2.44        | 586.52        |
|               | 15.25       | <2.44             | <2.44             | <2.44             | <2.44        | 1071.69       |
| 3             | 16          | <2.44             | <2.44             | <2.44             | 20.52        | 2132.25       |
|               | 17          | <2.44             | <2.44             | <2.44             | <2.44        | 568.66        |
|               | 1           | <2.44             | <2.44             | <2.44             | <2.44        | 339.27        |
|               | 1.25        | <2.44             | <2.44             | <2.44             | 12.23        | 1068.12       |
|               | 2           | <2.44             | <2.44             | <2.44             | <2.44        | 1052.64       |
|               | 8           | <2.44             | <2.44             | <2.44             | <2.44        | 699.23        |
|               | 8.25        | <2.44             | <2.44             | <2.44             | <2.44        | 1020.63       |
|               | 9           | <2.44             | <2.44             | <2.44             | 39.43        | 2285.00       |
|               | 10          | <2.44             | <2.44             | <2.44             | 10.32        | 653.85        |
|               | 15          | <2.44             | <2.44             | <2.44             | <2.44        | 708.65        |
| 15.25         | <2.44       | <2.44             | <2.44             | <2.44             | 917.54       |               |
| 16            | <2.44       | <2.44             | <2.44             | 41.38             | 1669.22      |               |
| 17            | <2.44       | <2.44             | <2.44             | 33.86             | 725.91       |               |

Dataset 5: Pre- and post-injection cytokine levels in individual cynomolgus monkeys treated with 3 doses of AIRISE-02 on days 1, 8 and 15.

**TABLE EXPLANATION**

| <b>Abbreviation</b> | <b>Description</b>                 |
|---------------------|------------------------------------|
| TNF-alpha           | Tumor necrosis factor alpha        |
| IFN-gamma           | Interferon gamma                   |
| IL-1 beta           | Interleukin 1 beta                 |
| IL-6                | Interleukin 6                      |
| MCP-1               | Monocyte chemoattractant protein 1 |

Dataset 6: Individual dermal observations of cynomolgus monkeys treated with three doses AIRISE-02. Dermal observations were evaluated according to the method of Draize.

| Dose                | Animal number | Edema grade (Draize score 0-4) |   |   |   |   | Erythema grade (Draize score 0-4) |   |   |   |   |
|---------------------|---------------|--------------------------------|---|---|---|---|-----------------------------------|---|---|---|---|
|                     |               | Day(s) Relative to Dose Start  |   |   |   |   | Day(s) Relative to Dose Start     |   |   |   |   |
|                     |               | 1                              | 2 | 3 | 4 | 8 | 1                                 | 2 | 3 | 4 | 8 |
| 0.9 mg/kg AIRISE-02 | 1             | -                              | - | - | - | - | -                                 | - | - | - | - |
|                     | 2             | -                              | - | - | - | - | -                                 | - | - | - | - |
|                     | 3             | -                              | - | - | - | - | -                                 | - | - | - | - |
| 2.7 mg/kg AIRISE-02 | 1             | -                              | - | - | 3 | - | -                                 | - | 0 | - | - |
|                     | 2             | -                              | - | 3 | 3 | - | -                                 | - | 0 | 0 | - |
|                     | 3             | -                              | - | 2 | - | - | -                                 | - | 0 | - | - |
| 9.1 mg/kg AIRISE-02 | 1             | 1                              | 2 | 2 | 3 | 3 | 1                                 | 0 | 1 | 1 | 1 |
|                     | 2             | -                              | 2 | 2 | 2 | 3 | -                                 | 1 | 1 | 1 | 0 |
|                     | 3             | -                              | 1 | 2 | 2 | - | -                                 | 1 | 1 | 1 | 0 |

**TABLE EXPLANATION**

| Abbreviation | Description               |
|--------------|---------------------------|
| -            | No findings/Not evaluated |

| ERYTHEMA AND EDEMA OBSERVATIONS |                                                                                      |      |
|---------------------------------|--------------------------------------------------------------------------------------|------|
| OBSERVATION                     | DEFINITION                                                                           | CODE |
| Erythema - Grade 0              | No erythema                                                                          | 0    |
| Erythema - Grade 1              | Very slight erythema (barely perceptible)                                            | 1    |
| Erythema - Grade 2              | Well-defined erythema                                                                | 2    |
| Erythema - Grade 3              | Moderate to severe erythema                                                          | 3    |
| Erythema - Grade 4              | Severe erythema (beet redness) to slight eschar formation (injuries in depth)        | 4    |
| Maximized Grade 4               | Notable dermal lesions                                                               | M-4  |
| Edema - Grade 0                 | No edema                                                                             | 0    |
| Edema - Grade 1                 | Very slight edema (barely perceptible)                                               | 1    |
| Edema - Grade 2                 | Slight edema (edges of area well defined by definite raising)                        | 2    |
| Edema - Grade 3                 | Moderate edema (raised approximately 1 millimeter)                                   | 3    |
| Edema - Grade 4                 | Severe edema (raised more than 1 millimeter and extends beyond the area of exposure) | 4    |
